# Supplementary material for: Validation of a coupled δ 2 H n -alkane – δ 18 O sugar paleohygrometer approach based on a climate chamber experiment
Source: Copernicus journal article supplement (doi:10.5194/bg-18-5363-2021), 2021-10-04
Supplement: Supplementary file 1 [file Climate_Chamber_Leaf_d18Osugar_d2Hnalkane.xlsx]

## Sheet: Leaf_d18Osugar_d2Hn-alkane
Climate Chamber/ Plant Type	δ18O (n = 3)	Leaf Arabinose			Leaf Xylose			Leaf Hemicellulose			δ2H (n = 3)	Leaf n-C29			Leaf n-C31			Leaf n-alkane
Eucalyptus globulus		[VSMOW, ‰]			[VSMOW, ‰]			[VSMOW, ‰]				[VSMOW, ‰]			[VSMOW, ‰]			[VSMOW, ‰]
1		33.055	±	1.6032	29.7401	±	3.61076	32.4597	±	1.96373		-192.5	±	2.67974				-192.5	±	2.67974
2		29.9525	±	1.23307	34.5615	±	3.82389	31.3649	±	2.02702		-203.2	±	1.41586				-203.2	±	1.41586
3		33.5867	±	0.408094	30.7842	±	1.05446	33.0403	±	0.534106		-212.6	±	0.284044				-212.6	±	0.284044
4		37.9686	±	1.4945	44.2712	±	2.49121	38.9782	±	1.65415		-169.5	±	0.618062				-169.5	±	0.618062
5		43.1586	±	0.563193	41.887	±	1.16063	42.8871	±	0.69076		-175.1	±	0.248034				-175.1	±	0.248034
6		45.7107	±	0.286837	43.528	±	4.77152	45.2938	±	1.14343		-143.591	±	0.870451				-143.591	±	0.870451
7		36.9683	±	1.03595	35.3692	±	1.60629	36.6959	±	1.13313		-164.6	±	0.512493				-164.6	±	0.512493
8		41.0092	±	0.403266	37.7449	±	1.46464	40.3558	±	0.615722		-159.5	±	1.54466				-159.5	±	1.54466
Vicia faba var. minor
1		36.62	±	2.29708	37.2014	±	1.83592	36.7096	±	2.22605		-152.421	±	1.21641	-180.831	±	2.02652	-169.277	±	1.69706
2		35.8036	±	0.155873	34.2014	±	1.70602	35.5422	±	0.408836		-162.386	±	1.83007	-194.238	±	0.635676	-182.739	±	1.06687
3		37.5559	±	0.902073	31.1186	±	1.73705	34.8377	±	1.25465		-136.5	±	0.831165	-168.1	±	1.28001	-154.123	±	1.08148
4		42.4213	±	0.577202	42.1104	±	1.64651	42.3909	±	0.681714		-161.162	±	0.650466	-162.461	±	3.68866	-161.592	±	1.65742
5		45.5707	±	0.809115	43.211	±	0.687678	45.0915	±	0.784452		-136.365	±	1.23741	-167.634	±	2.02442	-155.736	±	1.72496
6		44.4879	±	0.523181	43.4703	±	0.520903	44.3763	±	0.522931		-147.263	±	2.70299	-154.628	±	0.341523	-151.552	±	1.32794
7		38.1129	±	0.139288	35.9302	±	0.914221	37.8905	±	0.218246		-147.309	±	1.70686	-167.406	±	3.02955	-155.134	±	2.22187
8		43.2112	±	0.419057	42.8823	±	1.76788	43.1597	±	0.630463		-148.318	±	6.04345	-140.28	±	4.60342	-143.972	±	5.26495
Brassica oleracea var. medullosa
1		35.319	±	0.753866	34.9556	±	2.30198	35.2775	±	0.930937		-166.659	±	0.749495				-166.659	±	0.749495
2		35.8036	±	0.148928	34.2014	±	2.22664	35.6113	±	0.398324		-168.7	±	0.494944				-168.7	±	0.494944
3		38.6936	±	1.24302	36.6906	±	1.20259	38.3082	±	1.23524		-172	±	0.758836				-172	±	0.758836
4		41.7203	±	0.780334	49.6998	±	6.72063	41.7203	±	0.780334		-170.5	±	0.827619				-170.5	±	0.827619
5		45.9088	±	1.83117	44.2916	±	1.41432	45.6646	±	1.76823		-153.7	±	0.59445				-153.7	±	0.59445
6		47.062	±	0.761027	45.7517	±	2.03457	47.062	±	0.761027		-162.1	±	0.739729				-162.1	±	0.739729
7		41.1508	±	1.30136	43.6477	±	6.61826	41.1508	±	1.30136		-163.2	±	1.2878				-163.2	±	1.2878
8		41.2987	±	1.07003	41.7761	±	0.523119	41.3636	±	0.995702		-159.8	±	0.556257				-159.8	±	0.556257
