# Supplementary material for: Validation of a coupled δ 2 H n -alkane – δ 18 O sugar paleohygrometer approach based on a climate chamber experiment
Source: Copernicus journal article supplement (doi:10.5194/bg-18-5363-2021), 2021-10-04
Supplement: Supplementary file [file bg-18-5363-2021-supplement-title-page.pdf › bg-18-5363-2021-supplement-title-page.pdf]

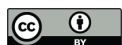

## *Supplement of*

# **Validation of a coupled $\delta^2\text{H}_{n\text{-alkane}}-\delta^{18}\text{O}_{\text{sugar}}$ paleohygrometer approach based on a climate chamber experiment**

**Johannes Hepp et al.**

*Correspondence to:* Johannes Hepp (johannes-hepp@gmx.de)

- bg-18-5363-2021-supplement-title-page.pdf
- Climate\_Chamber\_Leaf\_d18Osugar\_d2Hnalkane.xlsx
- Supplement\_Figs-S1-S2.docx

The copyright of individual parts of the supplement might differ from the article licence.
